# Supplementary material
Source: publisher figshare collection journal article supplement (https://gsajournals.figshare.com/ndownloader/files/24087257)
Supplement: Supplementary file 1 [file 24087257]

## Sheet: Sheet1
Table S1. Primers used for amplifying and Sanger sequencing viral coding sequences with codon optimization.
Primer name	Sequence (5' - 3')	Purpose
M13F	GTAAAACGACGGCCAGT	Sanger sequence clones with a pDONR221 or pDONR223 backbone
M13R	CAGGAAACAGCTATGAC	Sanger sequence clones with a pDONR221 or pDONR223 backbone
pDONR207_Seq_F	TCGCGTTAACGCTAGCATGGATCT	Sanger sequence clones with a pDONR207 backbone
pDONR207_Seq_R	GTAACATCAGAGATTTTGAGACAC	Sanger sequence clones with a pDONR207 backbone
NSP1_Open_F1	CTGAACGGTGGCTACCCAACTTTCTTG	Amplify pDONR207-NSP1 without a termination codon
NSP1_Open_R1	TTCACGCATCAGCTCTCTGGTC	Amplify pDONR207-NSP1 without a termination codon
NSP-2_Open_F1	CCTGAAGGGAGGTTACCCAACTTTCTTG	Amplify pDONR223-NSP2 without a termination codon
NSP-2_Open_R1	GTGAAGGTGTTGTTGGTCACC	Amplify pDONR223-NSP2 without a termination codon
PLPRO_Open_F1	CCTGAAGGGCGGATACCCAACTTTCTTG	Amplify pDONR207-NSP3-PLPRO without a termination codon
PLPRO_Open_R1	GCGATCTTGGTGGTCACCAC	Amplify pDONR207-NSP3-PLPRO without a termination codon
NSP-4_Open_F1	CCGTGCTGCAGTACCCAACTTTCTTG	Amplify pDONR223-NSP4 without a termination codon
NSP-4_Open_R1	CGCTGGTGATAGAGGTCTGAG	Amplify pDONR223-NSP4 without a termination codon
NSP-5_Open_F1	GTGTGACCTTCCAGTACCCAACTTTCTTG	Amplify pDONR223-NSP5 without a termination codon
NSP-5_Open_R1	CAGAGCACTGCCTCACCAC	Amplify pDONR223-NSP5 without a termination codon
NSP-6_Open_F1	GCCACCGTGCAGTACCCAACTTTCTTG	Amplify pDONR223-NSP6 without a termination codon
NSP-6_Open_R1	CACCTTGATGCATGGCTTTCCG	Amplify pDONR223-NSP6 without a termination codon
NSP7_Open_F1	GGCTACCCTGCAGTACCCAACTTTCTTG	Amplify pDONR223-NSP7 without a termination codon
NSP7_Open_R1	CTGTTGTCCAGCATTTCCTCGC	Amplify pDONR223-NSP7 without a termination codon
NSP-8_Open_F1	CCGTGAAGCTGCAGTACCCAACTTTCTTG	Amplify pDONR223-NSP8 without a termination codon
NSP-8_Open_R1	CAGAGTTAGCGCGCAGGG	Amplify pDONR223-NSP8 without a termination codon
NSP-9_Open_F1	GTGAGGCTGCAGTACCCAACTTTCTTG	Amplify pDONR223-NSP9 without a termination codon
NSP-9_Open_R1	GGTAGCAGCCAGGCTACC	Amplify pDONR223-NSP9 without a termination codon
NSP-10_Open_F1	GAACCTATGCTGCAGTACCCAACTTTCTTG	Amplify pDONR223-NSP10 without a termination codon
NSP-10_Open_R1	CCTCAGCTGGTCGCAAGAG	Amplify pDONR223-NSP10 without a termination codon
RNApol_Open_F1	CACCGTGCTGCAGTACCCAACTTTCTTG	Amplify pDONR223-NSP12-RNApol without a termination codon
RNApol_Open_R1	TGAGGGGTGTACATGGCCTCG	Amplify pDONR223-NSP12-RNApol without a termination codon
Heli_Open_F1	GCTACCCTGCAGTACCCAACTTTCTTG	Amplify pDONR223-NSP13-Heli without a termination codon
Heli_Open_R1	CACGTTCCTGCGGGGG	Amplify pDONR223-NSP13-Heli without a termination codon
NSP-14_Open_F1	CACCAGGCTGCAGTACCCAACTTTCTTG	Amplify pDONR223-NSP14 without a termination codon
NSP-14_Open_R1	AAGGTGTTCCACAGGTTGTAGGTG	Amplify pDONR223-NSP14 without a termination codon
NSP-15_Open_F1	CCTAAGCTGCAGTACCCAACTTTCTTG	Amplify pDONR223-NSP15 without a termination codon
NSP-15_Open_R1	GTAGAAGGTTTCCACGTGGC	Amplify pDONR223-NSP15 without a termination codon
NSP-16_Open_F1	GTGCTGGTGAACAACTACCCAACTTTCTTG	Amplify pDONR223-NSP16 without a termination codon
NSP-16_Open_R1	GTCAGAGGAGATGACCACTCTG	Amplify pDONR223-NSP16 without a termination codon
attB_S-Roth_F	GGGGACAACTTTGTACAAAAAAGTTGGCATGTTCGTGTTCCTGGTGC	Amplify S with Gateway compatible attB sites
attB_S-RothO_R2	GGGGACAACTTTGTACAAGAAAGTTGGGTAGGTGTAGTGCAGCTTCAC	Amplify S without termination codon with Gateway compatible attB sites
F-COVID19-S-SP-BP-Fritz	GGGGACAACTTTGTACAAAAAAGTTGGCATGTTCGTGTTCCTGGTGCTG	Amplify N-terminal Spike protein fragments with the gateway flanking residues
F-COVID19-S-Soluble-BP-Fritz	GGGGACAACTTTGTACAAAAAAGTTGGCATGGTGAACCTGACCACCAGAACC	Amplify N-terminal Spike protein fragments with the gateway flanking residues, without the signal peptide
F-COVID19-Furin-C-Fritz	GGGGACAACTTTGTACAAAAAAGTTGGCATGGTGGCCTCTCAGAGCATCATC	Amplify C-terminal Spike protein fragments with the gateway flanking residues, from the furin cleavage site
F-COVID19-S2-Fritz	GGGGACAACTTTGTACAAAAAAGTTGGCATGTCTTTCATCGAAGACCTGCTGTTC	Amplify C-terminal Spike protein fragments with the gateway flanking residues, from the Tmpress2 priming site
R-COVID19-S-ECD-BP-Fritz	GGGGACAACTTTGTACAAGAAAGTTGGGTAGGGCCACTTGATGTACTGCTC	Amplify Spike protein with the gateway flanking residues, up to the start of transmembrane domain segment.
R-S-ECD-Furin-C-BP-Fritz	GGGGACAACTTTGTACAAGAAAGTTGGGTAGGATCTGGCCCTTCTTGGGCT	Amplify Spike protein fragments with the gateway flanking residues, up to furin cleavage site
ORF3A_Open_F1	CTCCGTGCCACTGTACCCAACTTTCTTG	Amplify pDONR207-ORF3A without a termination codon
ORF3A_Open_R1	GTGGTGGTGGTAGGTTCGTCG	Amplify pDONR207-ORF3A without a termination codon
3b_Open_F1	CTGCTGGCCTTACCCAACTTTCTTG	Amplify pDONR223-ORF3B without a termination codon
3b_Open_R1	CATCTAGCGAAGGGGGTCAG	Amplify pDONR223-ORF3B without a termination codon
E_Open_F1	GACCTGCTGGTGTACCCAACTTTCTTG	Amplify pDONR207-E without a termination codon
E_Open_R1	AGGCACCCTGGAGCTGTTC	Amplify pDONR207-E without a termination codon
M_Open_F1	CCTGCTGGTGCAGTACCCAACTTTCTTG	Amplify pDONR207-M without a termination codon
M_Open_R1	GCGATGTTGTCGCTAGAGGAGC	Amplify pDONR207-M without a termination codon
6_Open_F1	CATGGAAATCGACTACCCAACTTTCTTG	Amplify pDONR223-ORF6 without a termination codon
6_Open_R1	GGCTGTTCCTCGTCCAG	Amplify pDONR223-ORF6 without a termination codon
ORF7A_Open_F1	GAAGCGTAAGACCGAATACCCAACTTTCTTG	Amplify pDONR207-ORF7A without a termination codon
ORF7A_Open_R1	AGGGTGAAGCACAGGGTGATG	Amplify pDONR207-ORF7A without a termination codon
7b_Open_F1	CCTGCCACGCTTACCCAACTTTCTTG	Amplify pDONR223-ORF7B without a termination codon
7b_Open_R1	TTTCGTTGTGGTCCTGCAG	Amplify pDONR223-ORF7B without a termination codon
8_Open_F1	GTGCTGGACTTCATCTACCCAACTTTCTTG	Amplify pDONR223-ORF8 without a termination codon
8_Open_R1	CACACGCACGTCGTGG	Amplify pDONR223-ORF8 without a termination codon
attB_N-Roth_F	GGGGACAACTTTGTACAAAAAAGTTGGCATGTCCGACAACGGTCC	Amplify N with Gateway compatible attB sites
attB_N-RothO_R2	GGGGACAACTTTGTACAAGAAAGTTGGGTAAGCCTGGGTGGAGTCAG	Amplify N without termination codon with Gateway compatible attB sites
9b_Open_F1	GTGGTGACCGTGAAGTACCCAACTTTCTTG	Amplify pDONR223-ORF9B without a termination codon
9b_Open_R1	CACGAATTCGTCGGGCAG	Amplify pDONR223-ORF9B without a termination codon
9Bwu_AttB_F	GGGGACAACTTTGTACAAAAAAGTTGGCATGCTGCAATCGTGCTAC	Amplify ORF9Bwu from N gene with Gateway compatible attB sites
9Bwu_AttB_R1	GGGGACAACTTTGTACAAGAAAGTTGGGTATCAATCTGTCAAGCAGCAG	Amplify ORF9Bwu with a termination codon from N gene with Gateway compatible attB sites
9Bwu_AttBopen_R2	GGGGACAACTTTGTACAAGAAAGTTGGGTAATCTGTCAAGCAGCAG	Amplify ORF9Bwu without a termination codon from N gene with Gateway compatible attB sites
attB_10wu_F1	GGGGACAACTTTGTACAAAAAAGTTGGCATGGGCTACATCAACGTGTTC	Amplify ORF10Bwu with Gateway compatible attB sites
attB_10wuOpen_R1	GGGGACAACTTTGTACAAGAAAGTTGGGTAGGTCAGGTTGAAGTTCAC	Amplify ORF10Bwu without termination codon with Gateway compatible attB sites
E_TEV_F	GGGGACAACTTTGTACAAAAAAGTTGGCGAAAACCTGTACTTCCAAGGCATGTACTCTTTCGT	Ampify pDONR207-E with TEV
E_TEV_R	GGGGCAACTTTGTACAAGAAAGTTGGGTATTACACCAG	Ampify pDONR207-E with TEV
M_TEV_F	GGGGACAACTTTGTACAAAAAAGTTGGCGAAAACCTGTACTTCCAAGGCATGGCTGACTCTAA	Ampify pDONR207-M with TEV
M_TEV_R	GGGGCAACTTTGTACAAGAAAGTTGGGTATTACTGCAC	Ampify pDONR207-M with TEV
N_TEV_F	GGGGACAACTTTGTACAAAAAAGTTGGCGAAAACCTGTACTTCCAAGGCATGAGCGATAATGG	Ampify pDONR207-N with TEV
N_TEV_R	GGGGCAACTTTGTACAAGAAAGTTGGGTATTATCAGGC	Ampify pDONR207-N with TEV
NSP1_TEV_F	GGGGACAACTTTGTACAAAAAAGTTGGCGAAAACCTGTACTTCCAAGGCATGGAGAGCCTGGT	Ampify pDONR207-NSP1 with TEV
NSP1_TEV_R	GGGGCAACTTTGTACAAGAAAGTTGGGTATTAGCCA	Ampify pDONR207-NSP1 with TEV
ORF3A_TEV_F	GGGGACAACTTTGTACAAAAAAGTTGGCGAAAACCTGTACTTCCAAGGCATGGACCTGTTCA	Ampify pDONR207-ORF3A with TEV
ORF3A_TEV_R	GGGGCAACTTTGTACAAGAAAGTTGGGTATTACAGTGG	Ampify pDONR207-ORF3A with TEV
ORF7A_TEV_F	GGGGACAACTTTGTACAAAAAAGTTGGCGAAAACCTGTACTTCCAAGGCATGAAGATCATCCT	Ampify pDONR207-ORF7A with TEV
ORF7A_TEV_R	GGGGCAACTTTGTACAAGAAAGTTGGGTATTATTCGGT	Ampify pDONR207-ORF7A with TEV
PLPRO_TEV_F	GGGGACAACTTTGTACAAAAAAGTTGGCGAAAACCTGTACTTCCAAGGCATGGCCCCTACCAA	Ampify pDONR207-PLPRO(NSP3) with TEV
PLPRO_TEV_R	GGGGCAACTTTGTACAAGAAAGTTGGGTATTATCCGC	Ampify pDONR207-PLPRO(NSP3) with TEV
S_TEV_F	GGGGACAACTTTGTACAAAAAAGTTGGCGAAAACCTGTACTTCCAAGGCATGTTCGTGTTCCT	Ampify pDONR223-S with TEV
S_TEV_R	GGGGCAACTTTGTACAAGAAAGTTGGGTATTAGGTGT	Ampify pDONR223-S with TEV
7b_TEV_F	GGGGACAACTTTGTACAAAAAAGTTGGCGAAAACCTGTACTTCCAAGGCATGATCGAGCTGAG	Ampify pDONR223-7B with TEV
7b_TEV_R	GGGGCAACTTTGTACAAGAAAGTTGGGTATTAAGCGTG	Ampify pDONR223-7B with TEV
8_TEV_F	GGGGACAACTTTGTACAAAAAAGTTGGCGAAAACCTGTACTTCCAAGGCATGAAGTTCCTGGT	Ampify pDONR223-8 with TEV
8_TEV_R	GGGGCAACTTTGTACAAGAAAGTTGGGTATTAGATGAA	Ampify pDONR223-8 with TEV
3b_TEV_F	GGGGACAACTTTGTACAAAAAAGTTGGCGAAAACCTGTACTTCCAAGGCATGGCCTACTGCTG	Ampify pDONR223-3B with TEV
3b_TEV_R	GGGGCAACTTTGTACAAGAAAGTTGGGTATTAAGGC	Ampify pDONR223-3B with TEV
6_TEV_F	GGGGACAACTTTGTACAAAAAAGTTGGCGAAAACCTGTACTTCCAAGGCATGTTCCACCTGGT	Ampify pDONR223-6 with TEV
6_TEV_R	GGGGCAACTTTGTACAAGAAAGTTGGGTATTAGTCGAT	Ampify pDONR223-6 with TEV
9B_TEV_F	GGGGACAACTTTGTACAAAAAAGTTGGCGAAAACCTGTACTTCCAAGGCATGGACCCAAAGAT	Ampify pDONR223-9B with TEV
9B_TEV_R	GGGGCAACTTTGTACAAGAAAGTTGGGTATTACTTCAC	Ampify pDONR223-9B with TEV
Heli_TEV_F	GGGGACAACTTTGTACAAAAAAGTTGGCGAAAACCTGTACTTCCAAGGCATGGCCGTGGGCGC	Ampify pDONR223-Heli(NSP13) with TEV
Heli_TEV_R	GGGGCAACTTTGTACAAGAAAGTTGGGTATTACTGCAG	Ampify pDONR223-Heli(NSP13) with TEV
NSP-2_TEV_F	GGGGACAACTTTGTACAAAAAAGTTGGCGAAAACCTGTACTTCCAAGGCATGGCTTACACCCG	Ampify pDONR223-NSP2 with TEV
NSP-2_TEV_R	GGGGCAACTTTGTACAAGAAAGTTGGGTATTAACCTCC	Ampify pDONR223-NSP2 with TEV
NSP-4_TEV_F	GGGGACAACTTTGTACAAAAAAGTTGGCGAAAACCTGTACTTCCAAGGCATGAAGATCGTGAA	Ampify pDONR223-NSP4 with TEV
NSP-4_TEV_R	GGGGCAACTTTGTACAAGAAAGTTGGGTATTACTGCAG	Ampify pDONR223-NSP4 with TEV
NSP-5_TEV_F	GGGGACAACTTTGTACAAAAAAGTTGGCGAAAACCTGTACTTCCAAGGCATGTCCGGATTCCG	Ampify pDONR223-NSP5 with TEV
NSP-5_TEV_R	GGGGCAACTTTGTACAAGAAAGTTGGGTATTACTGGAA	Ampify pDONR223-NSP5 with TEV
NSP-6_TEV_F	GGGGACAACTTTGTACAAAAAAGTTGGCGAAAACCTGTACTTCCAAGGCATGAGCGCCGTGAA	Ampify pDONR223-NSP6 with TEV
NSP-6_TEV_R	GGGGCAACTTTGTACAAGAAAGTTGGGTATTACTGCAC	Ampify pDONR223-NSP6 with TEV
NSP-7_TEV_F	GGGGACAACTTTGTACAAAAAAGTTGGCGAAAACCTGTACTTCCAAGGCATGAGCAAGATGTC	Ampify pDONR223-NSP7 with TEV
NSP-7_TEV_R	GGGGCAACTTTGTACAAGAAAGTTGGGTATTACTGCAG	Ampify pDONR223-NSP7 with TEV
NSP-8_TEV_F	GGGGACAACTTTGTACAAAAAAGTTGGCGAAAACCTGTACTTCCAAGGCATGGCCATCGCTAG	Ampify pDONR223-NSP8 with TEV
NSP-8_TEV_R	GGGGCAACTTTGTACAAGAAAGTTGGGTATTACTGCAG	Ampify pDONR223-NSP8 with TEV
NSP-9_TEV_F	GGGGACAACTTTGTACAAAAAAGTTGGCGAAAACCTGTACTTCCAAGGCATGAACAACGAGCT	Ampify pDONR223-NSP9 with TEV
NSP-9_TEV_R	GGGGCAACTTTGTACAAGAAAGTTGGGTATTACTGCAG	Ampify pDONR223-NSP9 with TEV
NSP-10_TEV_F	GGGGACAACTTTGTACAAAAAAGTTGGCGAAAACCTGTACTTCCAAGGCATGGCTGGTAACGC	Ampify pDONR223-NSP10 with TEV
NSP-10_TEV_R	GGGGCAACTTTGTACAAGAAAGTTGGGTATTACTGCAG	Ampify pDONR223-NSP10 with TEV
NSP-14_TEV_F	GGGGACAACTTTGTACAAAAAAGTTGGCGAAAACCTGTACTTCCAAGGCATGGCTGAGAACGT	Ampify pDONR223-NSP14 with TEV
NSP-14_TEV_R	GGGGCAACTTTGTACAAGAAAGTTGGGTATTACTGCAG	Ampify pDONR223-NSP14 with TEV
NSP-15_TEV_F	GGGGACAACTTTGTACAAAAAAGTTGGCGAAAACCTGTACTTCCAAGGCATGTCTCTGGAGAA	Ampify pDONR223-NSP15 with TEV
NSP-15_TEV_R	GGGGCAACTTTGTACAAGAAAGTTGGGTATTACTGCAG	Ampify pDONR223-NSP15 with TEV
NSP-16_TEV_F	GGGGACAACTTTGTACAAAAAAGTTGGCGAAAACCTGTACTTCCAAGGCATGTCTTCCCAGGC	Ampify pDONR223-NSP16 with TEV
NSP-16_TEV_R	GGGGCAACTTTGTACAAGAAAGTTGGGTATTAGTTGTT	Ampify pDONR223-NSP16 with TEV
RNApol_TEV_F	GGGGACAACTTTGTACAAAAAAGTTGGCGAAAACCTGTACTTCCAAGGCATGTCCGCCGCTAG	Ampify pDONR223-RNAPol(NSP12) with TEV
RNApol_TEV_R	GGGGCAACTTTGTACAAGAAAGTTGGGTATTACTGCAG	Ampify pDONR223-RNAPol(NSP12) with TEV
E-27nt_F	GTGAACTCCGTGCTGCTGTTCCTG	Ampify E-27nt deletion CDS variant
E-27nt_R	GAAAGAGTACATGCCAACTTTTTTGTACAA	Ampify E-27nt deletion CDS variant
S-24bt_F	GCCTCTCAGAGCATCATCGCCTAC	Ampify S-24nt deletion CDS variant
S-24bt_R	GTTGGTCTGGGTCTGGTAAGAAGC	Ampify S-24nt deletion CDS variant
7b-trunc_F	ATGCTGATCATCTTCTGGTTCTCC	Ampify 7b-trunc deletion CDS variant
7b-trunc_R	GCCAACTTTTTTGTACAAAGTTGGC	Ampify 7b-trunc deletion CDS variant
